# Supplementary material for: Impact of Drug Exposure on Resistance Selection Following Artemether-Lumefantrine Treatment for Malaria in Children With and Without HIV in Uganda
Source: PubMed Central journal article supplement — Clin Pharmacol Ther. Author manuscript; Available in PMC 2024 Mar 1. (PMC9981240; doi:10.1002/cpt.2768), 2022-11-14

Figure S4: Normalized prediction distribution errors (NPDE) and conditional weighted residuals (CWRES) versus population predictions, time, and time after dose. Solid black circles represent the individual NPDE values (A, left plots) and CWRES values (B, right plots) associated with each observation record. The solid horizontal grey lines (residuals = -2, 0, 2 for NPDE and residuals = 0 for CWRES) were included for reference. The dashed blue line represents a LOESS smooth through the data.

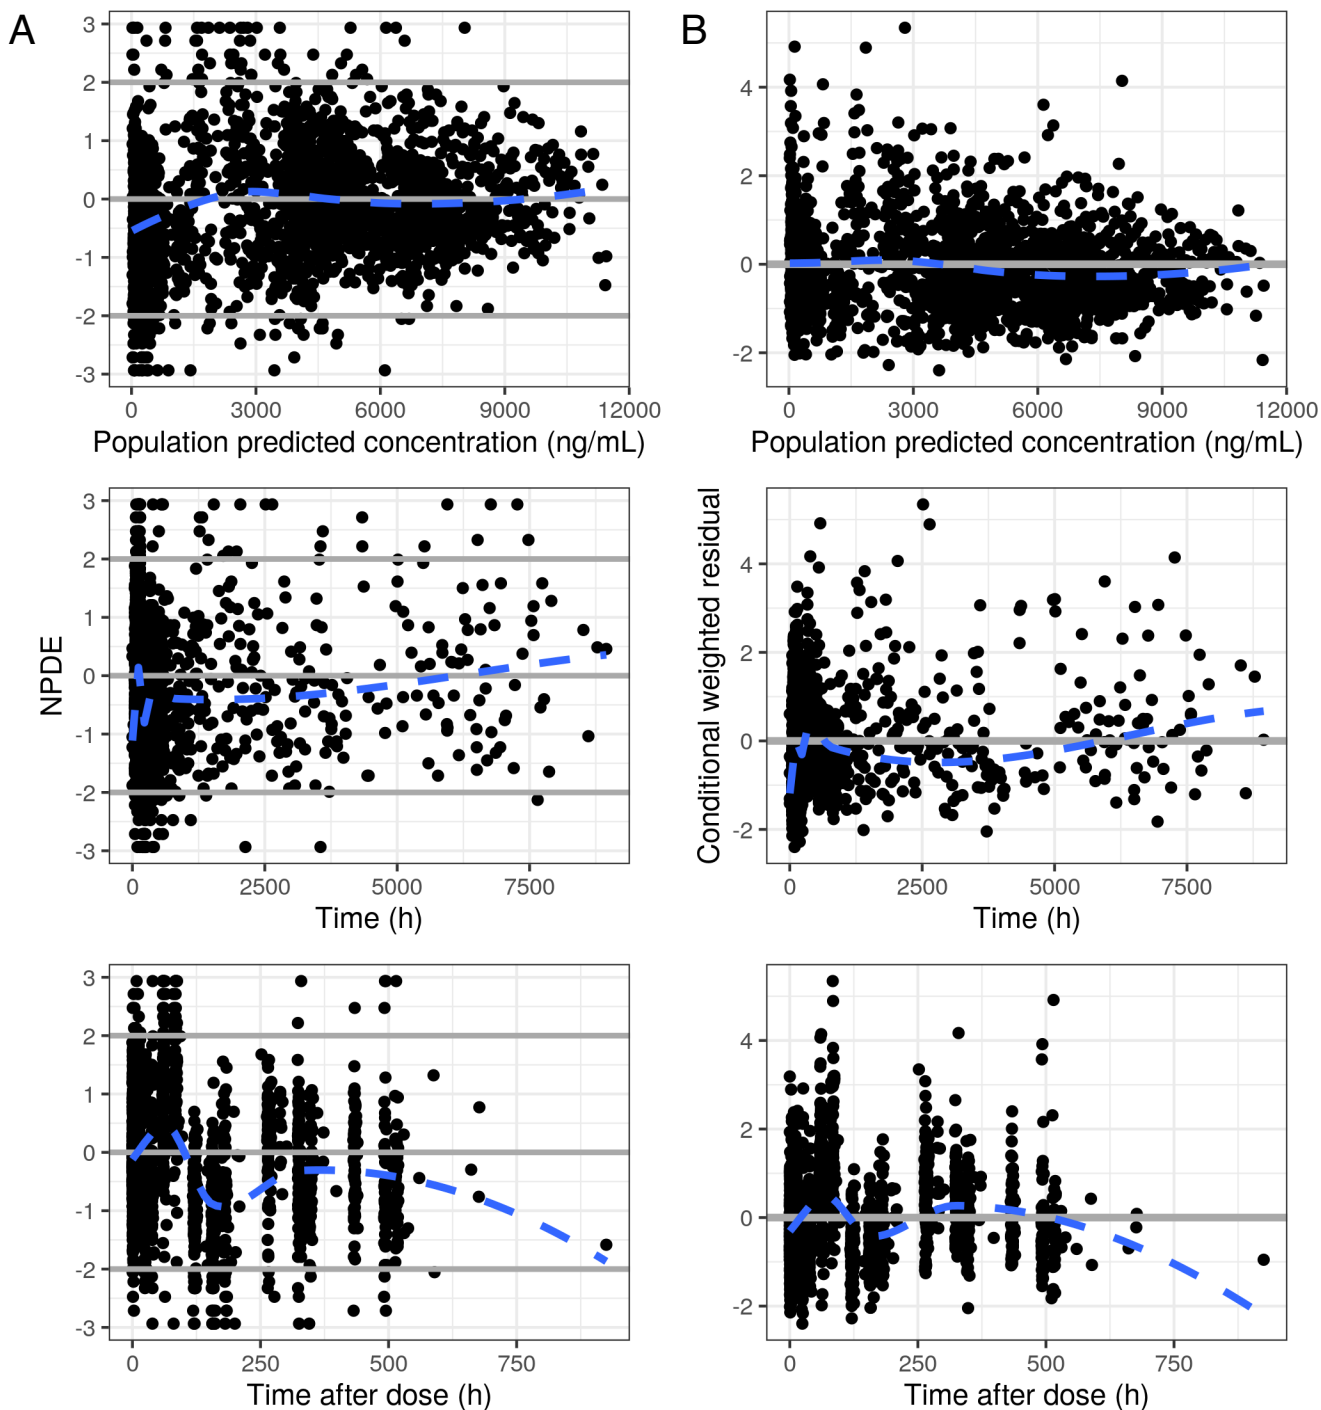

Supplement: NIHMS1849997-supplement-Figure_S4.pdf [file NIHMS1849997-supplement-Figure_S4.pdf]
