# Supplementary material for: Impact of Drug Exposure on Resistance Selection Following Artemether-Lumefantrine Treatment for Malaria in Children With and Without HIV in Uganda
Source: PubMed Central journal article supplement — Clin Pharmacol Ther. Author manuscript; Available in PMC 2024 Mar 1. (PMC9981240; doi:10.1002/cpt.2768), 2022-11-14

Figure S1: Visual predictive check (VPC) of the dose-normalized lumefantrine concentration versus time for patients with and without ART. The lines represent the median (solid black), 5th and 95th percentiles (dashed red) of the observed data. Blue and red shaded regions represent the 90% prediction interval of the corresponding (i.e., 5th, 50th and 95th) percentiles. Blue circles represent the observed concentrations.

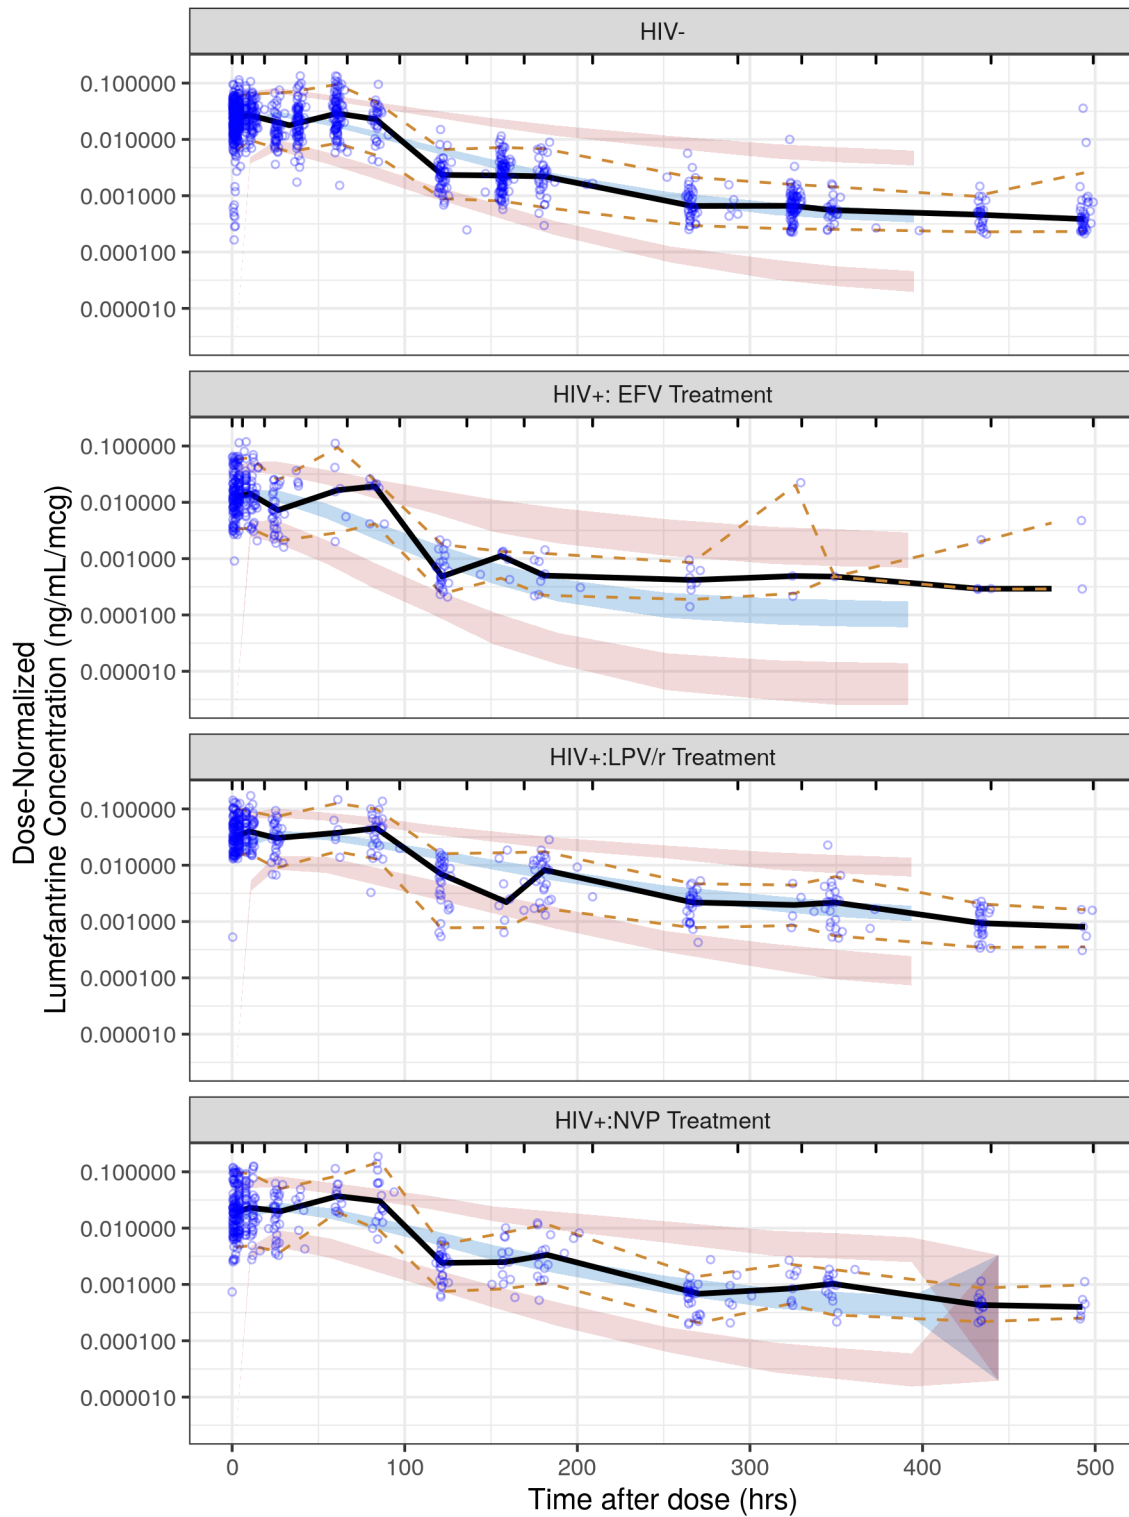

Supplement: NIHMS1849997-supplement-FigureS1.pdf [file NIHMS1849997-supplement-FigureS1.pdf]
