# Supplementary material for: Impact of Drug Exposure on Resistance Selection Following Artemether-Lumefantrine Treatment for Malaria in Children With and Without HIV in Uganda
Source: PubMed Central journal article supplement — Clin Pharmacol Ther. Author manuscript; Available in PMC 2024 Mar 1. (PMC9981240; doi:10.1002/cpt.2768), 2022-11-14

Figure S3. Model observations versus predictions. Observed values for the entire cohort, indicated by solid black circles, for population (A, B, top left) and individual (C, D, top right) predictions on a linear- (A, C) and log-scale (B, D). Observed values stratified by HIV status and ART regimen for population (E, middle) and individual (F, bottom) predictions on a log-scale. The line of identity (solid grey) is included as a reference ( $x=y$ ). The dashed blue line represents a LOESS smooth through the data.

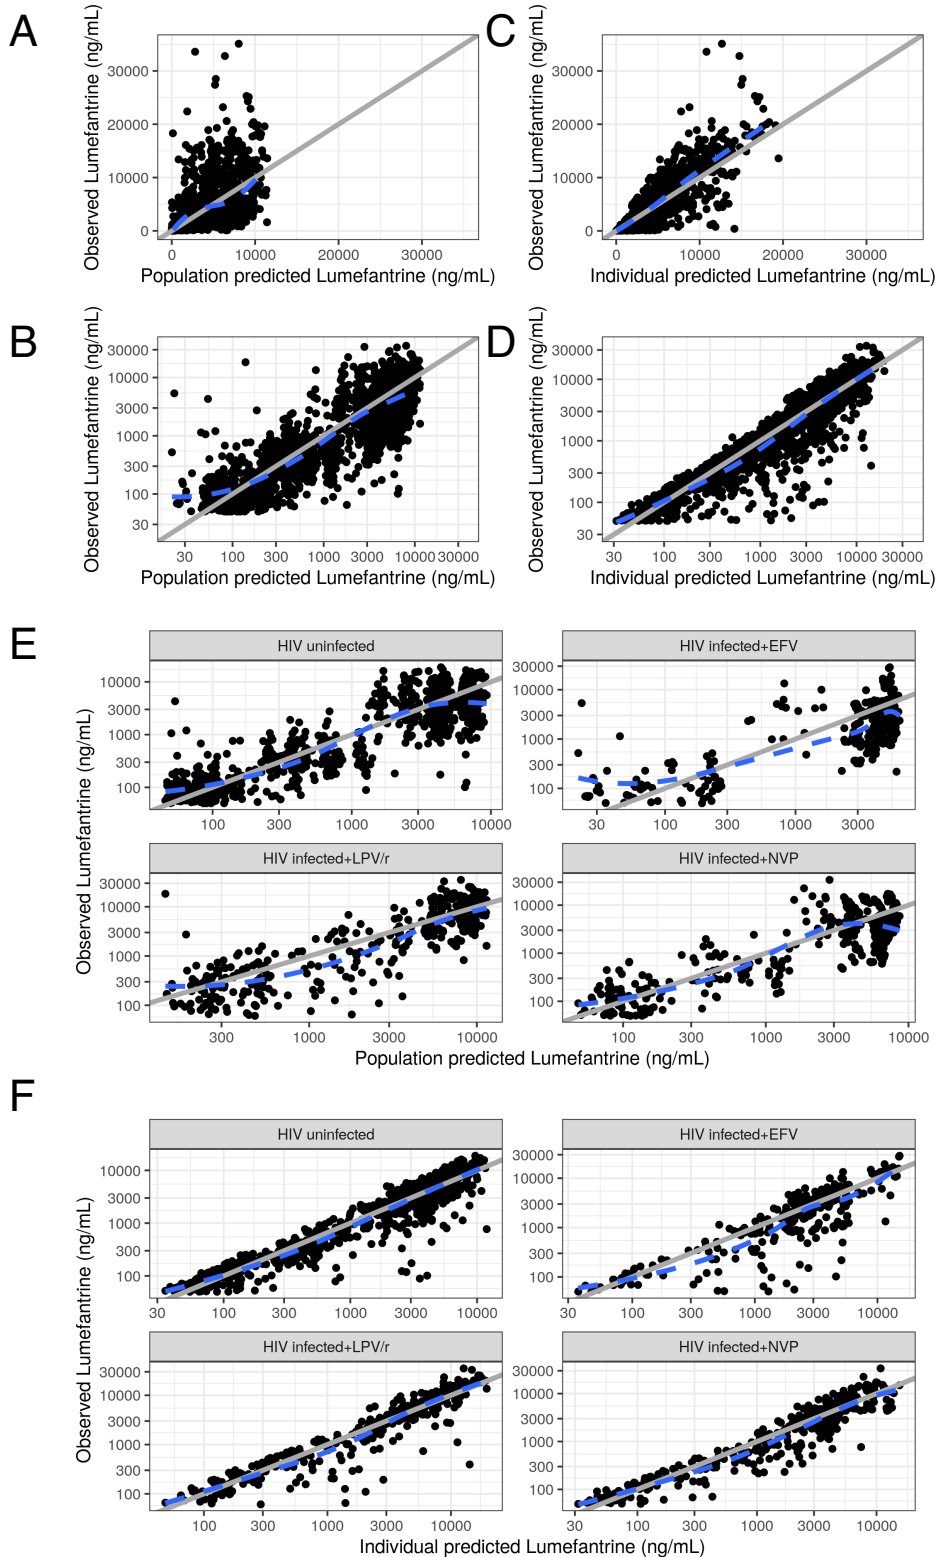

Supplement: NIHMS1849997-supplement-FigureS3.pdf [file NIHMS1849997-supplement-FigureS3.pdf]
